# Supplementary material for: Structural trends in antibody-antigen binding interfaces: a computational analysis of 1833 experimentally determined 3D structures
Source: PubMed Central journal article supplement (PMC10755492; doi:10.1016/j.csbj.2023.11.056), 2023-12-05
Supplement: mmc1.pdf [file mmc1.pdf]

## Supplemental materials

### **Structural trends in antibody-antigen binding interfaces: a computational analysis of 1833 experimentally determined 3D structures**

Andreas V. Madsen<sup>1</sup>, Oscar Mejias-Gomez<sup>1</sup>, Lasse E. Pedersen<sup>1</sup>, J. Preben Morth<sup>1</sup>, Peter Kristensen<sup>2</sup>, Timothy P. Jenkins<sup>1</sup>, Steffen Goletz<sup>1\*</sup>

<sup>1</sup>Department of Biotechnology and Biomedicine, Technical University of Denmark, Kgs. Lyngby, Denmark. <sup>2</sup>Department of Chemistry and Bioscience, Aalborg University, Aalborg, Denmark.

\*Correspondence: Steffen Goletz, [sgoletz@dtu.dk](mailto:sgoletz@dtu.dk)

## Supplementary figure S1

Comparison of the number of the total atom-atom contacts obtained for the three Ab-Ag complex groups (protein-binding Fv antibodies, peptide-binding Fv antibodies and protein-binding sdAbs) when using three different distance cutoffs of 3Å (a), 4Å (b), 5Å (c) and 6Å (d) respectively.

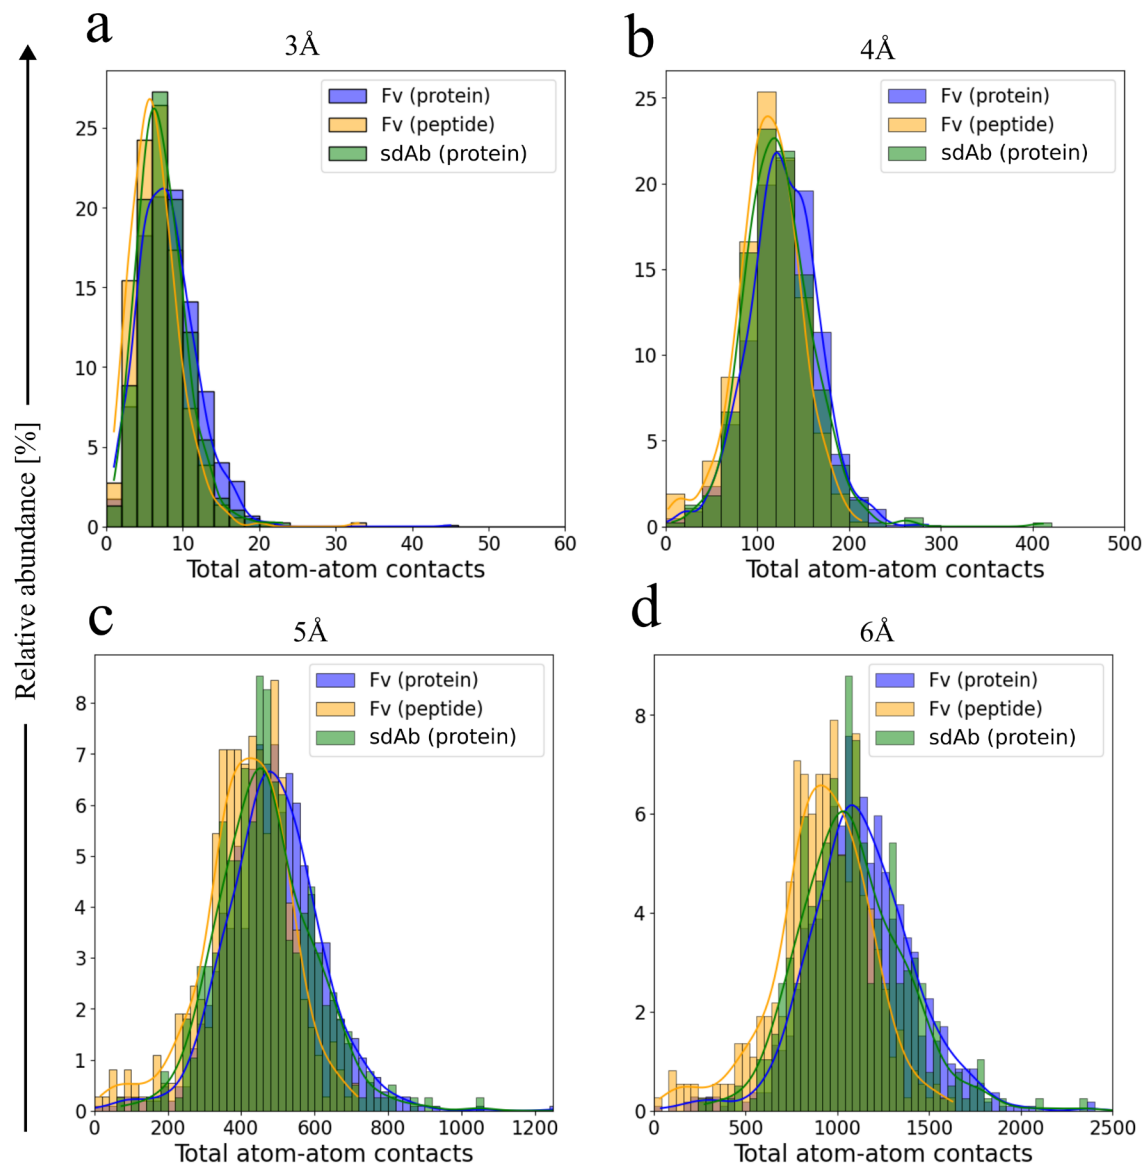

## Supplementary figure S2

Comparison of the relative amino acid abundances of uPRs obtained for the three Ab-Ag complex groups (protein-binding Fv antibodies, peptide-binding Fv antibodies and protein-binding sdAbs) when using three different distance cutoffs of 3Å (a), 4Å (b), 5Å (c) and 6Å (d) respectively.

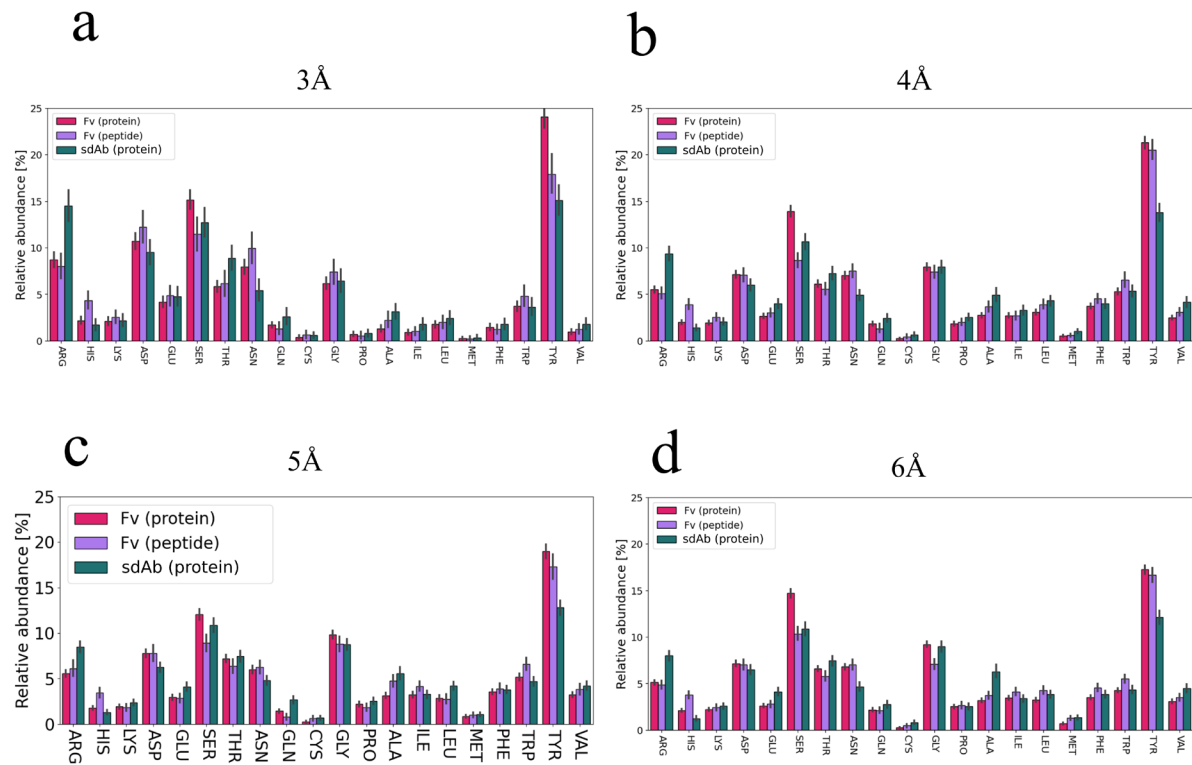

## Supplementary figure S3

Comparison of the relative amino acid abundances of uPRs obtained for the three Ab-Ag complex groups (protein-binding Fv antibodies, peptide-binding Fv antibodies and protein-binding sdAbs) when using three different distance cutoffs of 3Å (a), 4Å (b), 5Å (c) and 6Å (d) respectively.

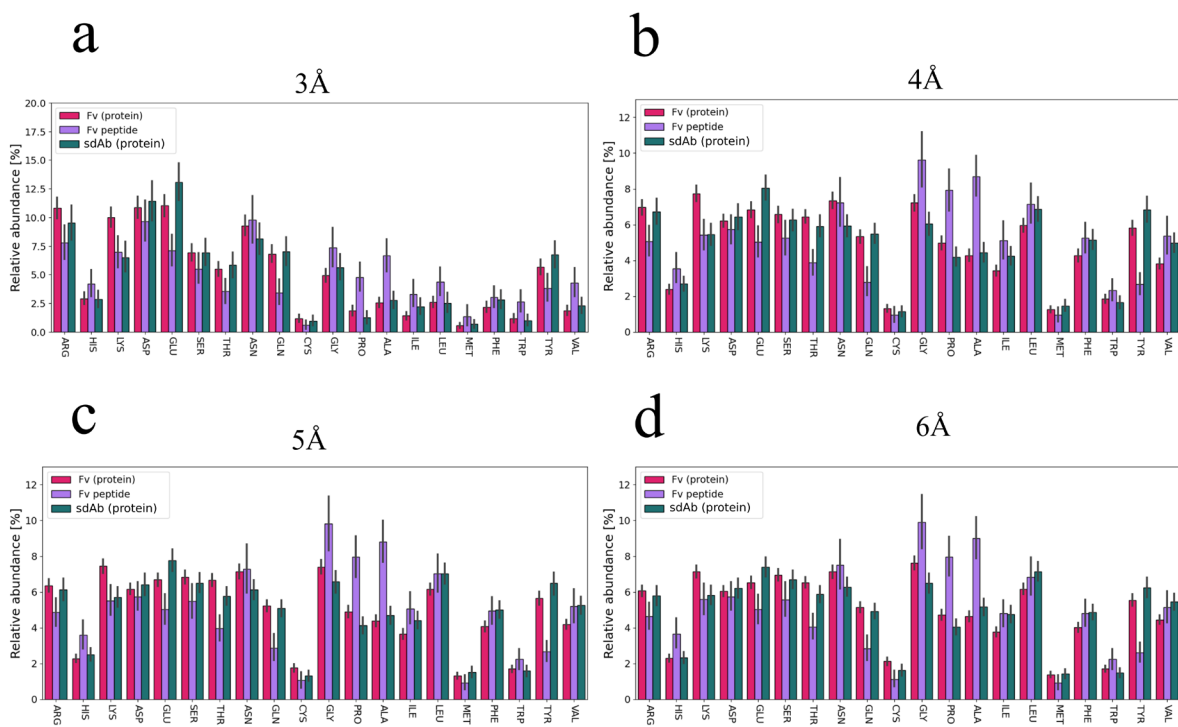

## Supplementary figure S4

Comparison of unique paratope residues obtained for the three Ab-Ag complex groups (protein-binding Fv antibodies, peptide-binding Fv antibodies and protein-binding sdAbs) when using three different distance cutoffs of 3Å (a), 4Å (b), 5Å (c) and 6Å (d) respectively.

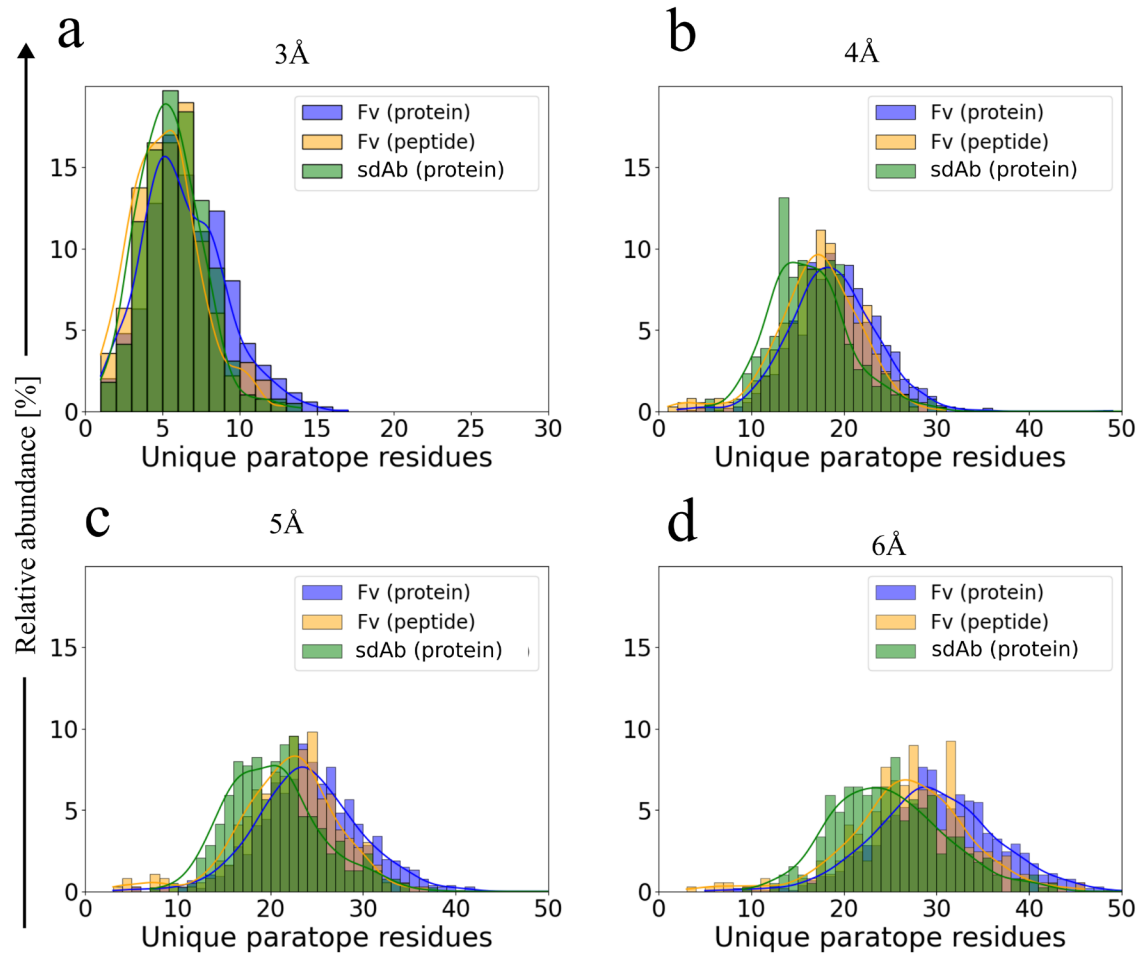

## Supplementary figure S5

Comparison of unique epitope residues obtained for the three Ab-Ag complex groups (protein-binding Fv antibodies, peptide-binding Fv antibodies and protein-binding sdAbs) when using three different distance cutoffs of 3Å (a), 4Å (b), 5Å (c) and 6Å (d) respectively.

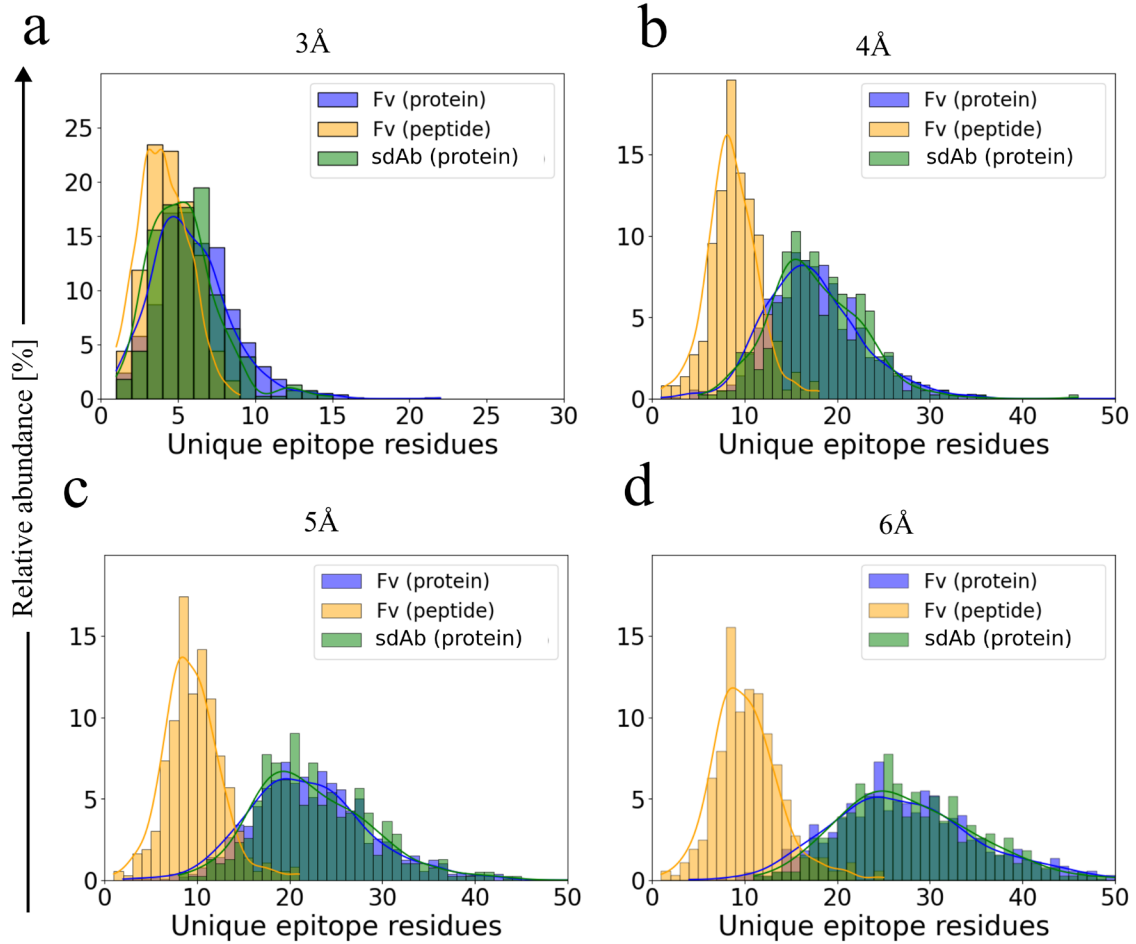

## Supplementary figure S6

Comparison of distribution of paratope residues in the different antibody domains in the three Ab-Ag complex groups (protein-binding Fv antibodies, peptide-binding Fv antibodies and protein-binding sdAbs) when using three different distance cutoffs of 3Å (a), 4Å (b), 5Å (c) and 6Å (d) respectively.

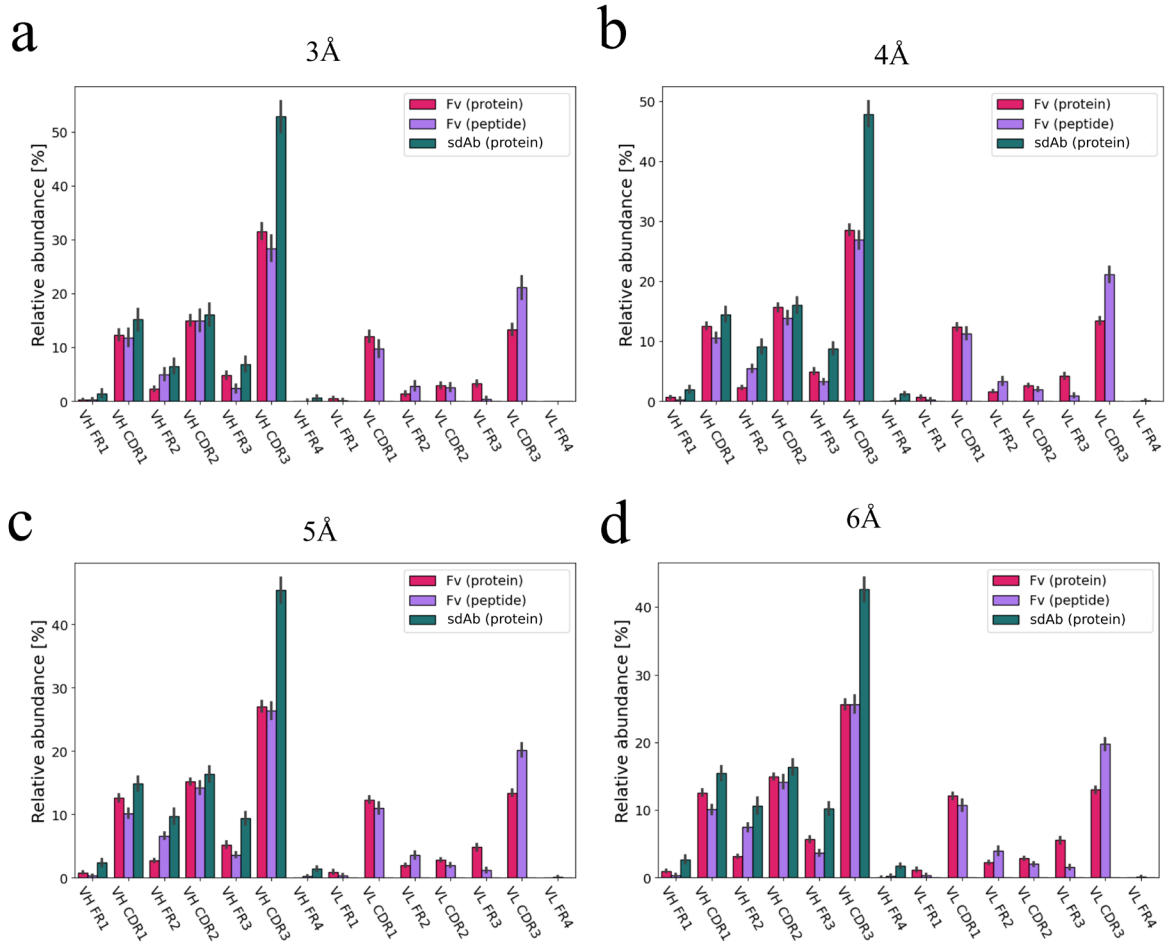

## Supplementary figure S7

Example of atom-atom contacts in the antibody:antigen interface. The image shows a single uPBR in contact with a single uEBR. The two residues form two total atom-atom contacts involving two uPBR atoms and two uEBR atoms.

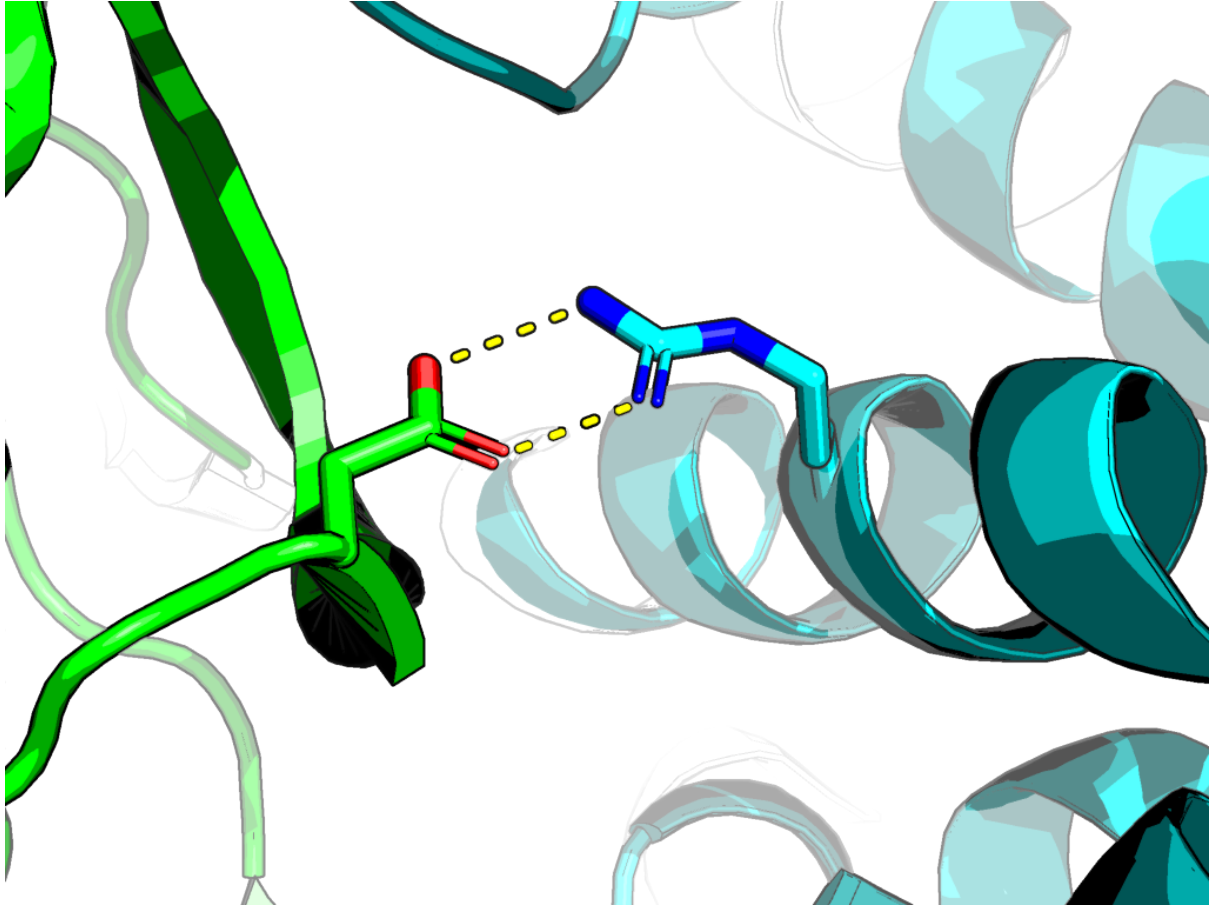



## Supplementary Figure S8

The table below is an example of an extracted selection of contact points 36 out of 537 from the Ab-Ag interface originating from PDB ID 6Q20 and renumbered according to the IMGT numbering scheme as detailed in Materials and Methods. The contact points in the structural image are centered around residue D36 from the CDR1 region (yellow) and only highlight residues identified in the antigen (green) within a 5Å distance from residue D36 in the antibody. The identified contact residues are highlighted using stick representation and the stippled circle is shown to indicate the 5Å radius cutoff used for identifying contact residues using the byres operator implemented in pymol (The PyMOL Molecular Graphics System, Version 2.0 Schrödinger, LLC.). The methods described in this manuscript (Materials and Methods section 2.7) thus identifies the same contacts in the Ab-Ag interface as when applying the same distance cutoff in Pymol.

| Antigen type | PDB_imgt  | Ab type | Chain type (VH/VL) | Ab chain ID | Ab domain | Ab resi ID | Ab resi aa | Ab atom | Ab atom coordinate        | Ag chain ID | Ag resi ID | Ag resi aa | Ag atom | Ag atom coordinate         | Contact distance (Å) | Structure resolution (Å) |
|--------------|-----------|---------|--------------------|-------------|-----------|------------|------------|---------|---------------------------|-------------|------------|------------|---------|----------------------------|----------------------|--------------------------|
| protein      | 6q20_imgt | Fv      | VH                 | H           | CDR1      | 36         | ASP        | N       | [-38.629, -33.969, 6.824] | A           | 295        | TRP        | CZ2     | [-41.172, -29.881, 6.597]  | 4.8198               | 2.45                     |
| protein      | 6q20_imgt | Fv      | VH                 | H           | CDR1      | 36         | ASP        | CA      | [-39.989, -33.459, 6.695] | A           | 295        | TRP        | CZ2     | [-41.172, -29.881, 6.597]  | 3.7698               | 2.45                     |
| protein      | 6q20_imgt | Fv      | VH                 | H           | CDR1      | 36         | ASP        | CA      | [-39.989, -33.459, 6.695] | A           | 295        | TRP        | CH2     | [-41.342, -30.054, 5.251]  | 3.9382               | 2.45                     |
| protein      | 6q20_imgt | Fv      | VH                 | H           | CDR1      | 36         | ASP        | C       | [-40.869, -33.755, 7.901] | A           | 295        | TRP        | CZ2     | [-41.172, -29.881, 6.597]  | 4.0988               | 2.45                     |
| protein      | 6q20_imgt | Fv      | VH                 | H           | CDR1      | 36         | ASP        | C       | [-40.869, -33.755, 7.901] | A           | 295        | TRP        | CH2     | [-41.342, -30.054, 5.251]  | 4.5764               | 2.45                     |
| protein      | 6q20_imgt | Fv      | VH                 | H           | CDR1      | 36         | ASP        | O       | [-42.041, -33.363, 7.9]   | A           | 248        | GLY        | CA      | [-45.264, -29.715, 7.383]  | 4.8952               | 2.45                     |
| protein      | 6q20_imgt | Fv      | VH                 | H           | CDR1      | 36         | ASP        | O       | [-42.041, -33.363, 7.9]   | A           | 295        | TRP        | CE2     | [-41.604, -28.676, 7.149]  | 4.7669               | 2.45                     |
| protein      | 6q20_imgt | Fv      | VH                 | H           | CDR1      | 36         | ASP        | O       | [-42.041, -33.363, 7.9]   | A           | 295        | TRP        | CZ2     | [-41.172, -29.881, 6.597]  | 3.8180               | 2.45                     |
| protein      | 6q20_imgt | Fv      | VH                 | H           | CDR1      | 36         | ASP        | O       | [-42.041, -33.363, 7.9]   | A           | 295        | TRP        | CH2     | [-41.342, -30.054, 5.251]  | 4.2960               | 2.45                     |
| protein      | 6q20_imgt | Fv      | VH                 | H           | CDR1      | 36         | ASP        | CB      | [-40.652, -34.037, 5.441] | A           | 249        | ARG        | CG      | [-43.736, -31.424, 2.642]  | 4.9166               | 2.45                     |
| protein      | 6q20_imgt | Fv      | VH                 | H           | CDR1      | 36         | ASP        | CB      | [-40.652, -34.037, 5.441] | A           | 249        | ARG        | NH1     | [-40.628, -31.234, 1.927]  | 4.4951               | 2.45                     |
| protein      | 6q20_imgt | Fv      | VH                 | H           | CDR1      | 36         | ASP        | CB      | [-40.652, -34.037, 5.441] | A           | 295        | TRP        | CZ2     | [-41.172, -29.881, 6.597]  | 4.3450               | 2.45                     |
| protein      | 6q20_imgt | Fv      | VH                 | H           | CDR1      | 36         | ASP        | CB      | [-40.652, -34.037, 5.441] | A           | 295        | TRP        | CH2     | [-41.342, -30.054, 5.251]  | 4.0468               | 2.45                     |
| protein      | 6q20_imgt | Fv      | VH                 | H           | CDR1      | 36         | ASP        | CG      | [-40.06, -33.487, 4.162]  | A           | 249        | ARG        | CG      | [-43.736, -31.424, 2.642]  | 4.4810               | 2.45                     |
| protein      | 6q20_imgt | Fv      | VH                 | H           | CDR1      | 36         | ASP        | CG      | [-40.06, -33.487, 4.162]  | A           | 249        | ARG        | CD      | [-43.252, -32.152, 1.399]  | 4.4278               | 2.45                     |
| protein      | 6q20_imgt | Fv      | VH                 | H           | CDR1      | 36         | ASP        | CG      | [-40.06, -33.487, 4.162]  | A           | 249        | ARG        | NE      | [-42.462, -31.28, 0.531]   | 4.8810               | 2.45                     |
| protein      | 6q20_imgt | Fv      | VH                 | H           | CDR1      | 36         | ASP        | CG      | [-40.06, -33.487, 4.162]  | A           | 249        | ARG        | CZ      | [-41.229, -30.863, 0.805]  | 4.4183               | 2.45                     |
| protein      | 6q20_imgt | Fv      | VH                 | H           | CDR1      | 36         | ASP        | CG      | [-40.06, -33.487, 4.162]  | A           | 249        | ARG        | NH1     | [-40.628, -31.234, 1.927]  | 3.2240               | 2.45                     |
| protein      | 6q20_imgt | Fv      | VH                 | H           | CDR1      | 36         | ASP        | CG      | [-40.06, -33.487, 4.162]  | A           | 295        | TRP        | CZ2     | [-41.172, -29.881, 6.597]  | 4.4910               | 2.45                     |
| protein      | 6q20_imgt | Fv      | VH                 | H           | CDR1      | 36         | ASP        | CG      | [-40.06, -33.487, 4.162]  | A           | 295        | TRP        | CZ3     | [-41.926, -29.062, 4.454]  | 4.8112               | 2.45                     |
| protein      | 6q20_imgt | Fv      | VH                 | H           | CDR1      | 36         | ASP        | CG      | [-40.06, -33.487, 4.162]  | A           | 295        | TRP        | CH2     | [-41.342, -30.054, 5.251]  | 3.8229               | 2.45                     |
| protein      | 6q20_imgt | Fv      | VH                 | H           | CDR1      | 36         | ASP        | OD1     | [-39.175, -32.608, 4.243] | A           | 249        | ARG        | CG      | [-43.736, -31.424, 2.642]  | 4.9767               | 2.45                     |
| protein      | 6q20_imgt | Fv      | VH                 | H           | CDR1      | 36         | ASP        | OD1     | [-39.175, -32.608, 4.243] | A           | 249        | ARG        | CD      | [-43.252, -32.152, 1.399]  | 4.9918               | 2.45                     |
| protein      | 6q20_imgt | Fv      | VH                 | H           | CDR1      | 36         | ASP        | OD1     | [-39.175, -32.608, 4.243] | A           | 249        | ARG        | CZ      | [-41.229, -30.863, 0.805]  | 4.3685               | 2.45                     |
| protein      | 6q20_imgt | Fv      | VH                 | H           | CDR1      | 36         | ASP        | OD1     | [-39.175, -32.608, 4.243] | A           | 249        | ARG        | NH1     | [-40.628, -31.234, 1.927]  | 3.0599               | 2.45                     |
| protein      | 6q20_imgt | Fv      | VH                 | H           | CDR1      | 36         | ASP        | OD1     | [-39.175, -32.608, 4.243] | A           | 295        | TRP        | CZ2     | [-41.172, -29.881, 6.597]  | 4.1190               | 2.45                     |
| protein      | 6q20_imgt | Fv      | VH                 | H           | CDR1      | 36         | ASP        | OD1     | [-39.175, -32.608, 4.243] | A           | 295        | TRP        | CZ3     | [-41.926, -29.062, 4.454]  | 4.4930               | 2.45                     |
| protein      | 6q20_imgt | Fv      | VH                 | H           | CDR1      | 36         | ASP        | OD1     | [-39.175, -32.608, 4.243] | A           | 295        | TRP        | CH2     | [-41.342, -30.054, 5.251]  | 3.4978               | 2.45                     |
| protein      | 6q20_imgt | Fv      | VH                 | H           | CDR1      | 36         | ASP        | OD1     | [-39.175, -32.608, 4.243] | A           | 296        | LYS        | NZ      | [-37.753, -28.095, 4.633]  | 4.7478               | 2.45                     |
| protein      | 6q20_imgt | Fv      | VH                 | H           | CDR1      | 36         | ASP        | OD2     | [-40.477, -33.938, 3.074] | A           | 249        | ARG        | CG      | [-43.736, -31.424, 2.642]  | 4.1386               | 2.45                     |
| protein      | 6q20_imgt | Fv      | VH                 | H           | CDR1      | 36         | ASP        | OD2     | [-40.477, -33.938, 3.074] | A           | 249        | ARG        | CD      | [-43.252, -32.152, 1.399]  | 3.7008               | 2.45                     |
| protein      | 6q20_imgt | Fv      | VH                 | H           | CDR1      | 36         | ASP        | OD2     | [-40.477, -33.938, 3.074] | A           | 249        | ARG        | NE      | [-42.462, -31.28, 0.531]   | 4.1800               | 2.45                     |
| protein      | 6q20_imgt | Fv      | VH                 | H           | CDR1      | 36         | ASP        | OD2     | [-40.477, -33.938, 3.074] | A           | 249        | ARG        | CZ      | [-41.229, -30.863, 0.805]  | 3.8948               | 2.45                     |
| protein      | 6q20_imgt | Fv      | VH                 | H           | CDR1      | 36         | ASP        | OD2     | [-40.477, -33.938, 3.074] | A           | 249        | ARG        | NH1     | [-40.628, -31.234, 1.927]  | 2.9411               | 2.45                     |
| protein      | 6q20_imgt | Fv      | VH                 | H           | CDR1      | 36         | ASP        | OD2     | [-40.477, -33.938, 3.074] | A           | 249        | ARG        | NH2     | [-40.593, -30.071, -0.048] | 4.9713               | 2.45                     |
| protein      | 6q20_imgt | Fv      | VH                 | H           | CDR1      | 36         | ASP        | OD2     | [-40.477, -33.938, 3.074] | A           | 295        | TRP        | CH2     | [-41.342, -30.054, 5.251]  | 4.5357               | 2.45                     |

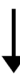

|                          |    |
|--------------------------|----|
| Total atom-atom contacts | 36 |
| Unique PRs               | 1  |
| Unique PR atoms          | 8  |
| Unique ERs               | 4  |
| Unique ER atoms          | 12 |

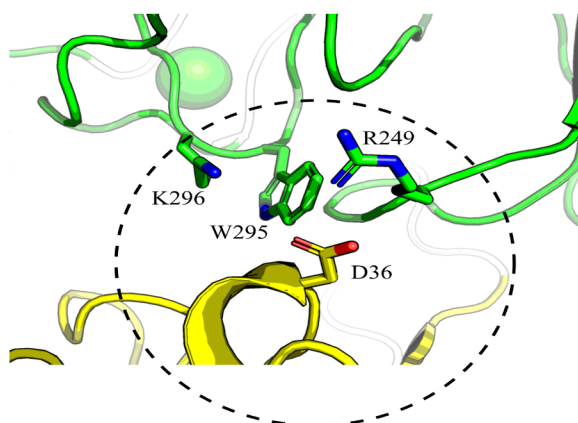

## Supplementary figure S9

Average percent of total atom-atom contacts found in the different antibody regions. The mean frequencies were calculated by taking the number of total contacts in each region relative to the total number of contacts for the individual PDBs. The mean frequencies were then found by averaging within the three data groups.

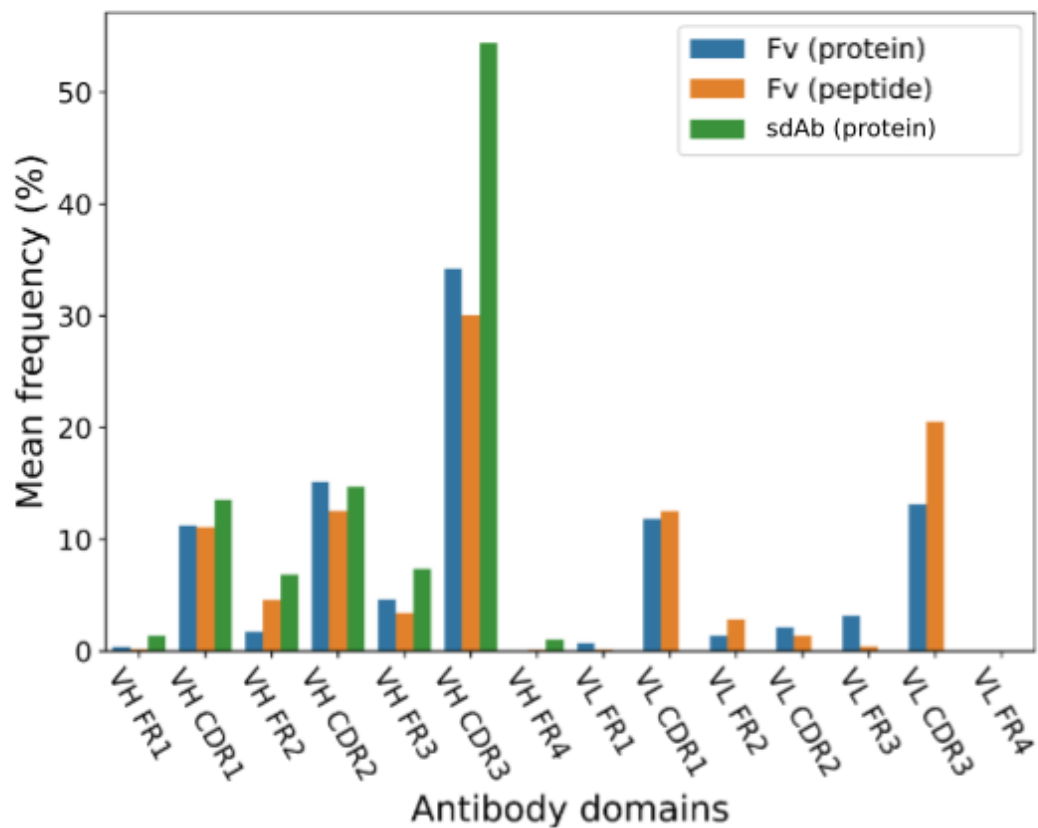

## Supplementary figure S10

Distributions of CDR lengths according to IMGT numbering scheme for protein-binding Fv antibodies (A), peptide-binding Fv antibodies (B) and protein-binding sdAbs (C). The distributions do not consider whether the residues are contact points.

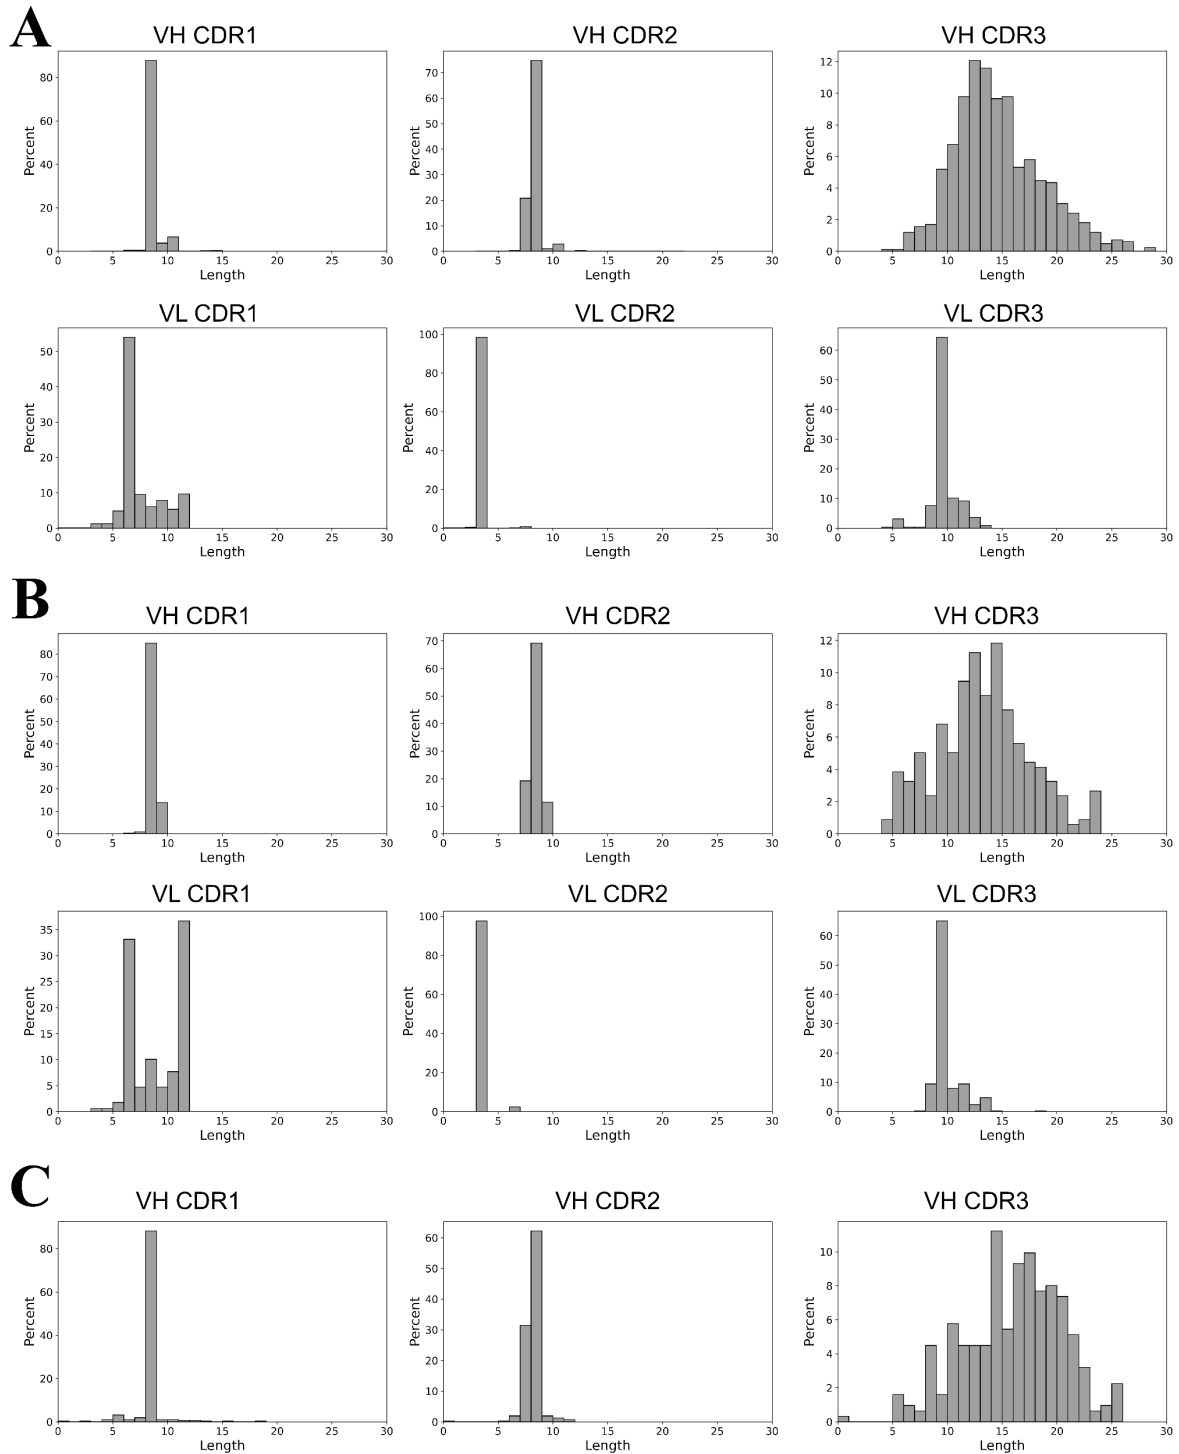

## Supplementary figure S11

Wu-Kabat variability indexes per position using the sequence data from Mejias-Gomez et. al<sup>1</sup>. (A) Average variability indexes per CDR. (B) Average variability index per position in CDRH3s. CDRH3 lengths from 8 to 25 aa considered for calculations C) CDRH1-8aa variability indexes per position. (D) CDRH2-8aa variability indexes per position (E) CDR $\kappa$ 1-6aa variability indexes per position (F) CDR $\kappa$ 2 variability indexes per position (G) CDR $\kappa$ 3 variability indexes per position. (H) CDR $\lambda$ 1 variability indexes per position (I) CDR $\lambda$ 2 variability indexes per position (J) CDR $\lambda$ 3 variability indexes per position.

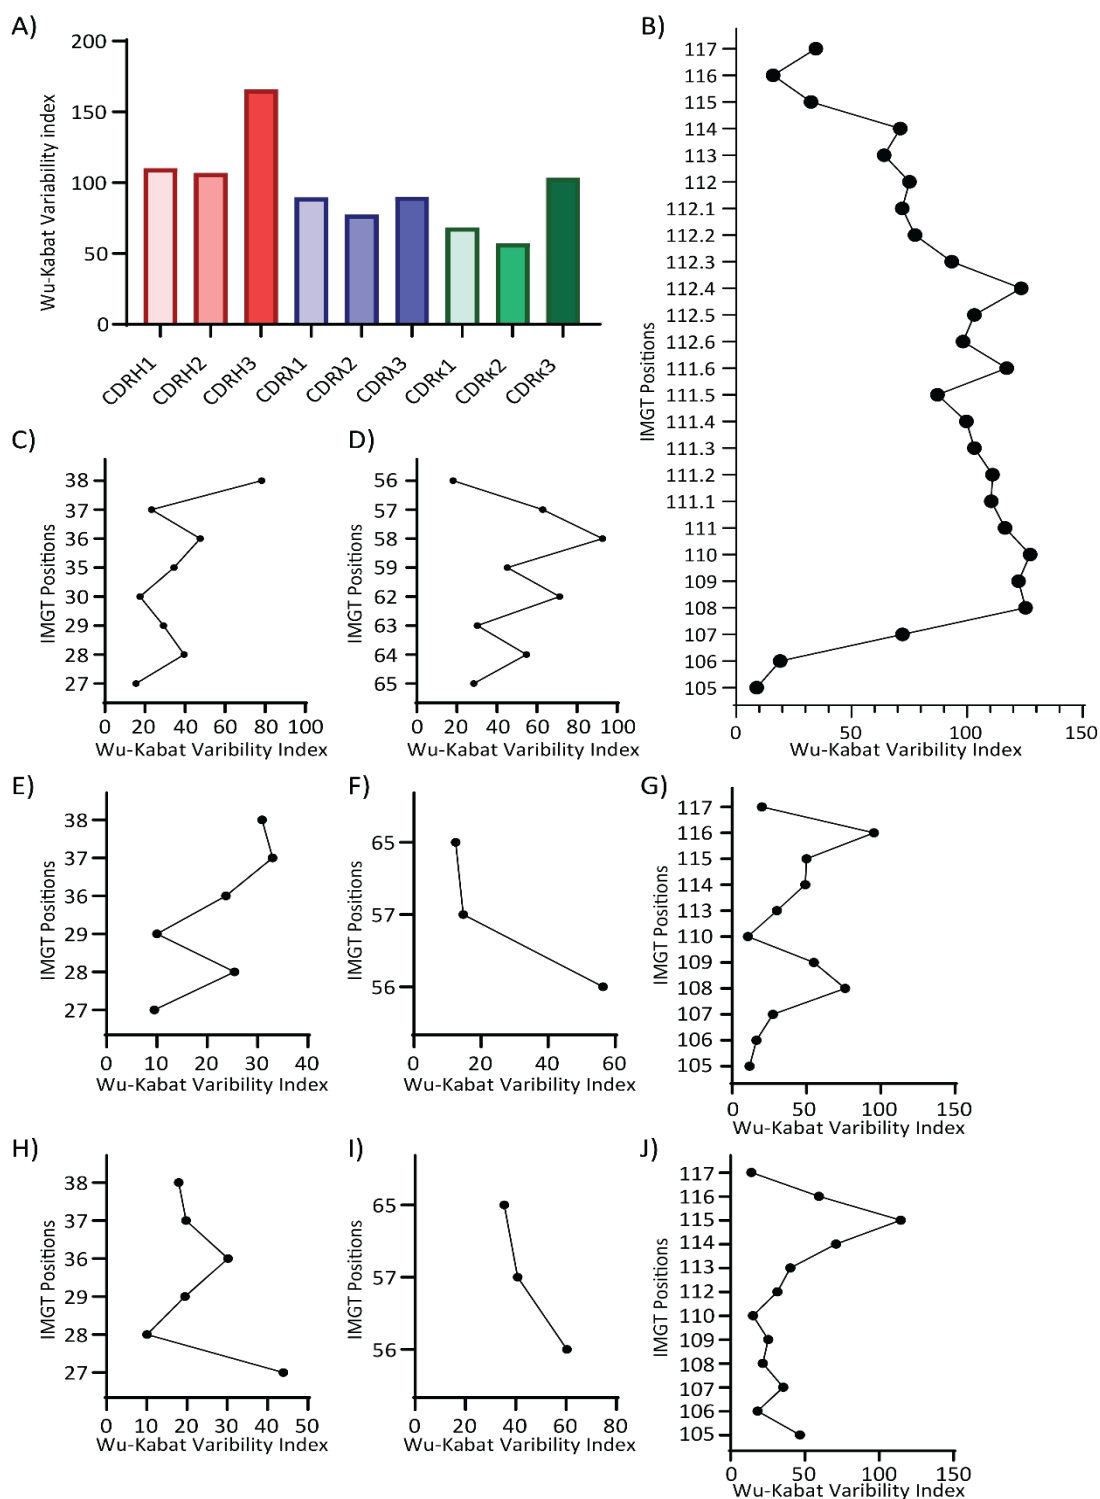

## Supplementary Table S1

Comparison of the relative amounts of PRs that have been mutated from the germline V genes. The numbers are calculated both with and without including the insertions. Since all the insertions will be considered a mutation relative to the germline gene the rate of mutations is naturally higher if including insertions. It should be noted that only germline V genes were included and the vast majority of PRs in CDR3 are thus considered to be mutated from germline.

|                                               | Mutated from germline<br>(including insertions) | Not mutated from germline<br>(including insertions) | Mutated from germline<br>(not including insertions) | Mutated from germline<br>(not including insertions) |
|-----------------------------------------------|-------------------------------------------------|-----------------------------------------------------|-----------------------------------------------------|-----------------------------------------------------|
| Protein-binding Fv<br>All CDRs                | 63.3%                                           | 36.7%                                               | 32.4%                                               | 67.6%                                               |
| Protein-binding Fv<br>All FRs                 | 22.4%                                           | 77.6%                                               | 22.0%                                               | 78.0%                                               |
| Protein-binding Fv<br>VH CDRs                 | 64.2%                                           | 35.8%                                               | 31.0%                                               | 69.0%                                               |
| Protein-binding Fv<br>VH FRs                  | 26.2%                                           | 73.8%                                               | 25.7%                                               | 74.3%                                               |
| Protein-binding Fv<br>VH, position 55+66      | 31.3%                                           | 68.7%                                               | 31.3%                                               | 68.7%                                               |
| Protein-binding Fv<br>VL CDRs                 | 61.5%                                           | 38.5%                                               | 34.8%                                               | 65.2%                                               |
| Protein-binding Fv<br>VL FRs                  | 18.0%                                           | 82.0%                                               | 17.7%                                               | 82.3%                                               |
| Protein-binding Fv<br>VL, position 55+66      | 21.8%                                           | 78.2%                                               | 21.8%                                               | 78.2%                                               |
| Peptide-binding Fv<br>All CDRs                | 70.8%                                           | 29.2%                                               | 43.0%                                               | 57.0%                                               |
| Protein-binding Fv<br>All FRs                 | 33.8%                                           | 66.2%                                               | 32.1%                                               | 67.9%                                               |
| Peptide-binding Fv<br>VH CDRs                 | 67.6%                                           | 32.4%                                               | 34.1%                                               | 65.9%                                               |
| Peptide-binding Fv<br>VH FRs                  | 26.7%                                           | 73.3%                                               | 25.5%                                               | 74.5%                                               |
| Peptide-binding Fv<br>VH, position 55+66      | 32.8%                                           | 67.2%                                               | 32.8%                                               | 67.2%                                               |
| Peptide-binding Fv<br>VL CDRs                 | 75.8%                                           | 24.2%                                               | 55.5%                                               | 44.5%                                               |
| Peptide-binding Fv<br>VL FRs                  | 47.6%                                           | 52.4%                                               | 45.5%                                               | 54.5%                                               |
| Peptide-binding Fv<br>VL, position 55+66      | 46.1%                                           | 53.9%                                               | 46.1%                                               | 53.9%                                               |
| Protein-binding sdAb<br>All CDRs              | 81.4%                                           | 18.6%                                               | 57.6%                                               | 42.4%                                               |
| Protein-binding sdAb<br>All FRs               | 38.2%                                           | 61.9%                                               | 31.9%                                               | 68.1%                                               |
| Protein-binding sdAb<br>VH, position 52+55+66 | 55.8%                                           | 44.2%                                               | 55.8%                                               | 44.2%                                               |

## References

1. Mejias-Gomez O, Madsen AV, Skovgaard K, Pedersen LE, Morth JP, Jenkins TP, Kristensen P, Goletz S. A window into the human immune system: comprehensive characterization of the complexity of antibody complementary-determining regions in functional antibodies. *mAbs* 2023; 15:2268255.
